# Supplementary material for: On the use of antibiotics to control plant pathogenic bacteria: a genetic and genomic perspective
Source: Front Microbiol. 2023 Jun 27;14:1221478. doi: 10.3389/fmicb.2023.1221478 (PMC10333595; doi:10.3389/fmicb.2023.1221478)
Supplement: Supplementary file 2 [file Table_2.xlsx]

## Sheet: Feuil1
Table S2. Repertoire of websites and documents referring the official list of authorized pesticides, among 195 countries screened. Reliability was assessed according to the extent of information available. Different documents were found: scientific publication, PDF document to download or official website. "+": document with no date indicated, or valid at a certain period. "++": document/website,…
#	Country	Antibiotic use authorization	Number of antibiotics	Authorized antibiotic							Date-paper	Reliability		Reference(s)
				Streptomycin	Gentamicin	Kasugamycin	Tetracycline	Oxolinic acid	Validamycin	Others
1	Argentina	Yes	3	Streptomycin	Gentamicin	Kasugamycin					?	"+++"		https://www.argentina.gob.ar/senasa/programas-sanitarios/productosveterinarios-fitosanitarios-y-fertilizantes/registro-nacional-de-terapeutica-vegetal
2	Bangladesh	Yes	2	Streptomycin			Tetracycline				2015	"++"		https://pest2.bengalsols.com/search?Rpest=Bacteria&Crop=&Group_Name=&Trade_Name=&Company_name=&Dose=&AP=
3	Belize	Yes	3	Streptomycin¹	Gentamicin		Oxytetracycline				2018	"++"		https://cahfsa.org/registered-pesticides/belize			http://www.plaguicidasdecentroamerica.una.ac.cr/index.php/base-de-datos-menu/222-estreptomicina
4	Bolivia	Yes	4	Streptomycin		Kasugamycine	Oxytetracycline	Oxolinic acid			2011, 2022	"+++"		Kasugamycina (SHAZUGAMYCYN) - SHARDA BOLIVIA S.R.L. - https://www.senasag.gob.bo/egp/productossv8.html				https://paititi.senasag.gob.bo/egp/productosAgroquimicos.html
5	Brazil	Yes	1			Kasugamycin					2017	"+++"		https://www.gov.br/anvisa/pt-br/assuntos/noticias-anvisa/2017/listas-de-ingredientes-ativos-com-uso-autorizado-e-banidos-no-brasil
6	Cambodia	Yes	3			Kasugamycin		Oxolinic acid	Validamycin		?	"+"		Pesticides Permitted for Use in Cambodia.pdf
7	Canada	Yes	2	Streptomycin		Kasugamycin					2022	"+++"		https://pr-rp.hc-sc.gc.ca/ls-re/result-eng.php?p_search_label=validamycin&searchfield1=NONE&operator1=CONTAIN&criteria1=&logicfield1=AND&searchfield2=NONE&operator2=CONTAIN&criteria2=&logicfield2=AND&searchfield3=NONE&operator3=CONTAIN&criteria3=&logicfield3=AND&searchfield4=NONE&operator4=CONTAIN&criteria4=&logicfield4=AND&p_operatordate=%3D&p_criteriadate=&p_status_reg=REGISTERED&p_searchexpdat…
8	Chile	Yes	4	Streptomycin	Gentamicin	Kasugamycin	Oxytetracycline							Lista de Plaguicidas Autorizados - Servicio Agrícola y Ganadero
9	China	Yes	3			Kasugamycin			Validamycin	Zhongshenmycin, Jingangmycin	2022	"++"		http://www.chinapesticide.org.cn/sjzx4ywb/index.jhtml
10	Colombia	Yes	5		Gentamicin	Kasugamycin	Oxytetracycline	Oxolinic acid	Validamycin		2022	"++"		https://www.ica.gov.co/getdoc/d3612ebf-a5a6-4702-8d4b-8427c1cdaeb1/registros-nacionales-pqua-15-04-09.aspx
11	Costa Rica	Yes	5	Streptomycin	Gentamicin	Kasugamycin	Oxytetracycline		Validamycin		?	"++"		http://www.plaguicidasdecentroamerica.una.ac.cr/index.php/base-de-datos-menu/222-estreptomicina
12	Ecuador	Yes	5	Streptomycin	Gentamicin	Kasugamycin	Oxytetracycline	Oxolinic acid			2022	"+++"		https://www.agrocalidad.gob.ec/366-2/
13	Egypt	Yes	2	Streptomycin		Kasugamycin					2022	"+++"		www.apc.gov.eg/en
14	El Salvador	Yes	4	Streptomycin	Gentamicin	Kasugamycin	Oxytetracycline				?	"++"		http://www.plaguicidasdecentroamerica.una.ac.cr/index.php/base-de-datos-menu/222-estreptomicina
15	Guatemala	Yes	4	Streptomycin	Gentamicin	Kasugamycin	Oxytetracycline				?	"++"		http://www.plaguicidasdecentroamerica.una.ac.cr/index.php/base-de-datos-menu/222-estreptomicina
16	Honduras	Yes	3	Streptomycin	Gentamicin		Oxytetracycline				?	"++"		http://bvirtual.infoagro.hn/xmlui/bitstream/handle/123456789/294/EDA_Manual_Listado_Productos_Registrados_Honduras_SENASA_01_08.pdf?sequence=1
17	India	Yes	4	Streptocyclin		Kasugamycin	Tetracycline		Validamycin		2022	"+++"		http://ppqs.gov.in/divisions/cib-rc/registrered-products
18	Israel	Yes	1					Oxolinic acid			2022	"+++"		https://www.gov.il/he/departments/general/pesticides-data-bank
19	Japan	Yes	4	Streptomycin		Kasugamycin	Oxytetracycline	Oxolinic acid			2022	"+++"		http://www.acis.famic.go.jp/eng/indexeng.htm
20	Malaysia	Yes	1			Kasugamycin					2022	"+++"		http://www.portal.doa.gov.my/racunberdaftar/
21	Mexico	Yes	3		Gentamicin	Kasugamycin	Oxytetracycline				?	"+++"		http://siipris03.cofepris.gob.mx/Resoluciones/Consultas/ConWebRegPlaguicida.asp
22	Mozambique	Yes	1			Kasugamycin					2020	"+++"		https://fdocuments.net/document/annex-1-list-of-pesticides-registered-in-mozambique-public-disclosure-authorized.html
23	Nepal	Yes	4	Streptomycin		Kasugamycin	Tetracycline		Validamycin		2021	"+++"		http://www.npponepal.gov.np/downloadsdetail/2/2018/39799637/
24	New Zealand	Yes	2	Streptomycin		Kasugamycin					2022	"+++"		https://eatsafe.nzfsa.govt.nz/web/public/acvm-register
25	Nicaragua	Yes	4	Streptomycin	Gentamicin	Kasugamycin	Oxytetracycline				?	"++"		http://www.plaguicidasdecentroamerica.una.ac.cr/index.php/base-de-datos-menu/222-estreptomicina									contact - mquiroz@sepres.gob.ni ?
26	Pakistan	Yes	1						Validamycin		?	"+++"		http://www.agripunjab.gov.pk/system/files/PESTICIDE%20REGISTERED%20LIST%20-%20Form%201.pdf									https://plantprotection.gov.pk/services/pesticide-registration/list-of-registered-pesticides-in-pakistan/
27	Panama	Yes	6	Streptomycin	Gentamicin¹	Kasugamycin	Oxytetracycline	Oxolinic acid	Validamycin		2020	"+++"		https://mida.gob.pa/wp-content/uploads/2020/05/Listado-de-Insumos-Fitosanitarios-Registrados.pdf?csrt=3439629386443367864
28	Paraguay	Yes	5	Streptomycin	Gentamicin	Kasugamycin	Oxytetracycline	Oxolinic acid			?	"+++"		http://secure.senave.gov.py:8443/registros/servlet/com.consultaregistros2.prod_agro2
29	Peru	Yes	5		Gentamicin	Kasugamycin	Oxytetracycline	Oxolinic acid	Validamycin		2015	"++"		https://cdn.www.gob.pe/uploads/document/file/1676334/ANEX2.pdf.pdf
30	Philippines	Yes	1				Oxytetracycline²				2019	"+++"		https://fpa.da.gov.ph/NW/index.php/information-resources/data/registered-products
31	South Korea	Yes	4	Streptomycin			Oxytetracycline	Oxolinic acid	Validamycin		?	"+++"		https://psis.rda.go.kr/psis/agc/res/agchmRegistStusLst.ps
32	Thailand	Yes	2	Streptomycin			Tetracycline				2019	"++"		https://journals.plos.org/plosone/article/file?id=10.1371/journal.pone.0225172&type=printable
33	United States of America	Yes	3	Streptomycin		Kasugamycin	Oxytetracycline				?	"+++"		•https://ordspub.epa.gov/ords/pesticides/f?p=chemicalsearch:1	http://npic.orst.edu/		http://npic.orst.edu/NPRO/product.s?co=91813&prod=74&dist=0
34	Vietnam	Yes	6	Streptomycin	Gentamicin	Kasugamycin	Oxytetracycline	Oxolinic acid	Validamycin					http://www.spsvietnam.gov.vn/Data/File/Notice/6329/Draft%20on%20Cirular%20promulgating%20the%20List%20plant%20protection%20products%20in%20Vietnam.pdf
35	Zambia	Use possible												https://ipen.org/sites/default/files/documents/final_toxics_free_sdgs_zambia_hhps_report-final.pdf
36	Algeria	No												https://www.inpv.edu.dz/
37	Antigua and Barbuda	No												https://cahfsa.org/registered-pesticides/antigua-barbuda
38	Australia	No												https://portal.apvma.gov.au/pubcris
39	Austria	No												https://psmregister.baes.gv.at/psmregister/;jsessionid=r5wRJ2d11U1879_qB_6CS4H1MXSHePMa1C75AoGplCwrReATwUVN!-1088100159
40	Barbados	No												https://cahfsa.org/registered-pesticides/barbados
41	Belarus													https://ggiskzr.by/doc/protection/Dopolnenie_23_11_2012.pdf
42	Belgium	No												https://fytoweb.be/en/plant-protection-products/consult-authorisations-plant-protection-products
43	Benin	No												http://csp.dev4u.it/index.cfm
44	Bhutan	No												https://www.nppc.gov.bt/pp-product-types/
45	Burkina Faso	No												http://csp.dev4u.it/index.cfm
46	Côte d'Ivoire	No												http://csp.dev4u.it/index.cfm
47	Cabo Verde	No												http://csp.dev4u.it/index.cfm
48	Cameroon	No												https://drcq-minader.org/docs/Liste_Pesticides_Homologues_042019.pdf
49	Chad	No												http://csp.dev4u.it/index.cfm
50	Croatia	No												https://fis.mps.hr/fis/javna-trazilica-szb/
51	Dominica	No												https://cahfsa.org/registered-pesticides/dominica
52	Estonia	No												https://portaal.agri.ee/avalik/#/taimekaitse/taimekaitsevahendid-otsing/en
53	Finland	No												https://www.kemidigi.fi/kasvinsuojeluainerekisteri/haku
54	France	No												https://ephy.anses.fr/
55	Gambia	No												http://csp.dev4u.it/index.cfm
56	Georgia													https://nfa.gov.ge/Ge/Page/Informationonagrochemicalsandpesticides/
57	Germany	No												https://apps2.bvl.bund.de/psm/jsp/index.jsp?modul=form
58	Ghana	No												http://csp.dev4u.it/index.cfm
59	Greece	No												http://www.minagric.gr/index.php/en/farmer-menu-2/plantprotection-menu/plantprotproducts-menu
60	Guinea	No												http://csp.dev4u.it/index.cfm
61	Guinea-Bissau	No												http://csp.dev4u.it/index.cfm
62	Guyana	No												https://cahfsa.org/registered-pesticides/guyana-pesticides
63	Indonesia	No												20720-ID-kajian-pestisida-berbahan-aktif-antibiotika(1).pdf
64	Iran	No												Survey
65	Ireland	No												https://www.pcs.agriculture.gov.ie/products/				https://www.pcs.agriculture.gov.ie/registers/plantprotectionproductsregisters/plantprotectionproductsdatabase/
66	Italy	No												https://www.sian.it/fitovis/
67	Jamaica	No ?												https://www.caribpesticides.net
68	Kazakhstan	No											See Taylor	https://ipen.org/sites/default/files/documents/final_en_kazakhstan_hhp_report_summary_18_may_2020_0.pdf
69	Kenya	No												https://pcpb.go.ke/listofregproducts/List%20of%20Registered%20Products%20%20Version%201_2018.pdf
70	Latvia													http://registri.vaad.gov.lv/
71	Lebanon	No												Survey
72	Liberia	No												◊
73	Lithuania													http://www.vatzum.lt/lt/#raap
74	Luxembourg	No												https://saturn.etat.lu/tapes/
75	Madagascar	No												https://apimadagascar.files.wordpress.com/2013/03/liste-pesticide-autorisc3a9-c3a0-madagascar.pdf
76	Maldives	No												Maldives National Chemical Profile
77	Mali	No												http://csp.dev4u.it/index.cfm
78	Mauritania	No												http://csp.dev4u.it/index.cfm
79	Morocco	No												http://eservice.onssa.gov.ma/IndPesticide.aspx		8 fungicide-bactericides, Beltanol, Caldo Bordeles Valles WP, Regalis, Bion 50 WG, Cohval, Valtonex, Botector, Hidrocuivre
80	Niger	No												http://csp.dev4u.it/index.cfm
81	Nigeria	No												http://csp.dev4u.it/index.cfm
82	Norway	No												https://www.mattilsynet.no/
83	Rwanda	No												Taylor et al.
84	Saint Lucia	No												https://cahfsa.org/registered-pesticides/st-lucia
85	Saint Vincent and the Grenadines	No												https://cahfsa.org/registered-pesticides/st-vincent-and-the-grenadines
86	Saudi Arabia	No												https://www.sfda.gov.sa/en/informationlist/65748
87	Senegal	No												http://csp.dev4u.it/index.cfm
88	Seychelles	No												https://seylii.org/sc/legislation/consolidated-act/164a
89	Sierra Leone	No												http://csp.dev4u.it/index.cfm
90	Sri Lanka	No												https://doa.gov.lk/rop-downloads/#1588566175088-0ea325ae-0f35
91	Suriname	No												https://cahfsa.org/registered-pesticides/suriname
92	Sweden	No												https://www.kemi.se/
93	Switzerland	No												https://www.psm.admin.ch/fr/produkte
94	Tanzania	No												https://www.tpri.go.tz/registered-pesticides-intanzania
95	Togo	No												http://csp.dev4u.it/index.cfm
96	Trinidad and Tobago	No												https://cahfsa.org/registered-pesticides/trinidad
97	Tunisia	No												http://www.agridata.tn/dataset/liste-des-pesticides-homologues-en-tunisie
98	Turkey	No												https://www.eppo.int/ACTIVITIES/plant_protection_products/registered_products
99	Uganda	No?												https://www.agriculture.go.ug/agrochemicals-list/
100	United Kingdom	No												https://www.hse.gov.uk/pesticides/
101	Yemen	No												http://www.plant-protection-yem.org/content.php?lng=english&id=30
102	Zimbabwe	No												http://www.drss.gov.zw/index.php/examinations/category/6-registered-pestcides-active-ingrediets-in-zimbabwe
